# Supplementary material for: Respiratory Disease Risk of Zoo-Housed Bonobos Is Associated with Sex and Betweenness Centrality in the Proximity Network
Source: MDPI journal article supplement (doi:10.3390/ani11123597), 2021-12-19
Supplement: s1 [file s1]

## Supplementary information

**Table S1.** Group composition of the studied bonobo group at Zoo Planckendael. For each individual, the sex, age in years, transferee status, betweenness centrality in the two proximity networks, and information on the occurrence of respiratory disease symptoms is given. Individuals that are 7 years or older were considered adults, individuals younger than 7 years were considered juveniles. For the dependent infants (all individuals younger than 2 years old), the mother-infant relationships are indicated by equal superscripts.

| ID              | Sex    | Age         | Transferee | Betweenness centrality |                           | Showed symptoms? |
|-----------------|--------|-------------|------------|------------------------|---------------------------|------------------|
|                 |        |             |            | Network of whole group | Network excluding infants |                  |
| HO              | Female | 43          | Yes        | 13                     | 7                         | Yes              |
| BY              | Female | 31          | No         | 6                      | 2                         | No               |
| VI              | Male   | 27          | No         | 0                      | 0                         | Yes              |
| BT <sup>a</sup> | Female | 24          | No         | 6.5                    | 8                         | No               |
| DJ <sup>b</sup> | Female | 24          | No         | 11                     | 18                        | Yes              |
| ZA              | Male   | 23          | No         | 0                      | 0                         | No               |
| BS              | Female | 17          | No         | 7                      | 5                         | Yes              |
| KG <sup>c</sup> | Female | 16          | Yes        | 8.5                    | 13                        | Yes              |
| HB              | Male   | 15          | No         | 0                      | 0                         | Yes              |
| NA <sup>d</sup> | Female | 15          | Yes        | 0.5                    | 1                         | No               |
| MZ              | Male   | 8           | No         | 7                      | 5                         | Yes              |
| KK              | Male   | 7           | Yes        | 20                     | 13                        | Yes              |
| BN              | Female | 6           | No         | 2                      | 1                         | No               |
| NL              | Female | 6           | Yes        | 4                      | 2                         | Yes              |
| MK              | Male   | 5           | Yes        | 1                      | 1                         | No               |
| SA              | Female | 4           | No         | 3                      | 2                         | No               |
| BL <sup>a</sup> | Female | 1           | No         | 5.5                    | /                         | No               |
| UN <sup>b</sup> | Female | 1           | No         | 11                     | /                         | Yes              |
| VY <sup>c</sup> | Male   | 0 (74 days) | Yes        | 8.5                    | /                         | Yes              |
| WK <sup>d</sup> | Female | 0 (14 days) | Yes        | 0.5                    | /                         | No               |

**Table S2.** Summary of the managed fission-fusion dynamics of the bonobo group at Zoo Planckendael. The group was divided into two subgroups at all times, which was variable in group composition due to transfers of certain individuals. The individuals that were transferred during the transition of one period to the next are indicated with an asterisk. Individuals that showed symptoms of respiratory disease during a certain period are indicated in red, while white individuals did not show symptoms during that period.

| Period 1: 14/01/2021 until 21/02/2021 |         | Period 2: 22/02/2021 until 25/02/2021 |         | Period 3: 26/02/2021 until 02/03/2021 |         | Period 4: 03/03/2021 until 26/03/2021 |         |
|---------------------------------------|---------|---------------------------------------|---------|---------------------------------------|---------|---------------------------------------|---------|
| Group 1                               | Group 2 |
| BS                                    | HO      | BS                                    | BL      | BS                                    | BL      | BS                                    | BL      |
| DJ                                    | BL      | DJ                                    | BN      | DJ                                    | BN      | DJ                                    | BN      |
| HB                                    | BN      | HB                                    | BT      | HB                                    | BT      | HB                                    | BT      |
| KG                                    | BT      | HO*                                   | BY      | HO                                    | BY      | HO                                    | BY      |
| MK                                    | BY      | KG                                    | MZ      | KK                                    | KG*     | KK                                    | KG      |
| NA                                    | KK      | KK*                                   | ZA      | NA                                    | MK*     | SA                                    | MK      |
| NL                                    | MZ      | MK                                    |         | NL                                    | MZ      | UN                                    | MZ      |
| SA                                    | ZA      | NA                                    |         | SA                                    | VY*     | VI                                    | NA*     |
| UN                                    |         | NL                                    |         | UN                                    | ZA      |                                       | NL*     |

|    |    |    |     |
|----|----|----|-----|
| VI | SA | VI | VY  |
| VY | UN | WK | WK* |
| WK | VI |    | ZA  |
|    | VY |    |     |
|    | WK |    |     |

**Table S3.** Test statistics obtained from the LM's investigating the individual characteristics associated with betweenness centrality after running 10 000 permutations.

| Dataset                   | Factor               | Estimate $\pm$ SE  | t-value | P-value |
|---------------------------|----------------------|--------------------|---------|---------|
| Whole network             | Sex (ref.: female)   | -0.794 $\pm$ 2.629 | -0.302  | 0.800   |
|                           | Age (ref.: adult)    | 0.057 $\pm$ 0.109  | 0.524   | 0.611   |
|                           | Transfer (ref.: yes) | 2.321 $\pm$ 2.577  | 0.900   | 0.389   |
| Network excluding infants | Sex (ref.: female)   | -2.314 $\pm$ 3.099 | -0.747  | 0.467   |
|                           | Age (ref.: adult)    | 0.063 $\pm$ 0.140  | 0.453   | 0.636   |
|                           | Transfer (ref.: yes) | 2.075 $\pm$ 3.057  | 0.679   | 0.513   |

**Table S4.** Test statistics obtained from the GLMs investigating the influence of betweenness centrality, sex, and age on the occurrence of respiratory disease symptoms after running 10 000 permutations. For the network excluding infants, we only tested for the effect of betweenness centrality.

| Dataset                   | Factor                              | Estimate $\pm$ SE  | z-value | p-value  |
|---------------------------|-------------------------------------|--------------------|---------|----------|
| Whole network             | <i>Betweenness centrality</i>       | 0.650 $\pm$ 0.338  | 1.922   | 0.002 ** |
|                           | Sex (ref. female)                   | 3.993 $\pm$ 2.330  | 1.714   | 0.014 *  |
|                           | Age (ref. adult)                    | -0.556 $\pm$ 1.389 | -0.400  | 0.608    |
|                           | Sex : <i>Betweenness centrality</i> | -0.224 $\pm$ 0.707 | -0.317  | 0.488    |
| Network excluding infants | <i>Betweenness centrality</i>       | 0.348 $\pm$ 0.196  | 1.774   | 0.023 *  |
